# Supplementary material for: Sera Protein Signatures of Endometrial Cancer Lymph Node Metastases
Source: Int J Mol Sci. 2022 Mar 18;23(6):3277. doi: 10.3390/ijms23063277 (PMC8954239; doi:10.3390/ijms23063277)
Supplement: Supplementary file 1 [file ijms-23-03277-s001.zip]

Archive with 15 entries (15 files):
- Supplemental Figure S1.tif
- Supplemental Figure S2.tif
- Supplemental Table S1.xls
- Supplementary A. File A1. Author comments concerning the Ovarian data previously published.pdf
- Supplementary A. File A2. Patient samples utilized for MSMS.pdf
- Supplementary A. File A3. Binary LOOCV test metrics.pdf
- Supplementary A. File A4. Concerning Files uploaded to JPost repository.pdf
- Supplementary A. File A5. LCQ-ADVANTAGE Instrument Method for MSMS example.pdf
- Supplementary A. File A6. LCQ-ADVANTAGE Machine Status Log MSMS example.pdf
- Supplementary B. File B1. Sera as used in LOOCV Figures.xlsx
- Supplementary B. File B2. Master peak areas for each patient De-identified.xlsx
- Supplementary B. File B3. LOOCV Significant peaks by test and figure.xlsx
- Supplementary B. File B4. LOOCV results of sera MS peaks.xlsx
- Supplementary B. File B5. Peak list for MSMS analysis of sera.xlsx
- Supplementary.pdf
